# Supplementary material for: Electrochemical System for Field Control of Hg2+ Concentration in Wastewater Samples
Source: MDPI journal article supplement (doi:10.3390/s23031084), 2023-01-17
Supplement: s1 [file s1]

## SUPPLEMENTARY INFORMATION

### *Electrochemical system for field control of $Hg^{2+}$ concentration in wastewater samples*

**Anda-Gabriela Tenea<sup>#1,2</sup>, Cristina Dinu<sup>#1</sup>, George-Octavian Buica<sup>\*3</sup>, Gabriela-Geanina Vasile<sup>\*1</sup>**

<sup>1</sup>National Research and Development Institute for Industrial Ecology ECOIND, 57-73 Drumul Podul Dambovitei Str., 060652, Bucharest, Romania, anda.tenea@incdecoind.ro (A.G.T.); cristina.dinu@incdecoind.ro (C.D.); gabriela.vasile@incdecoind.ro (G.-G.V.);

<sup>2</sup> Science Faculty, Chemistry Department, University of Craiova, 107i Bucharest Street, 200478 Craiova, Romania

<sup>3</sup> University Politehnica of Bucharest, Faculty of Chemical Engineering and Biotechnologies, 1-7 Polizu Str., 011061, Bucharest, Romania, george.buica@upb.ro (G.-O.B.)

\*Correspondence: george.buica@upb.ro (G.-O.B.); gabriela.vasile@incdecoind.ro (G.-G.V.).

#Authors with equal contribution

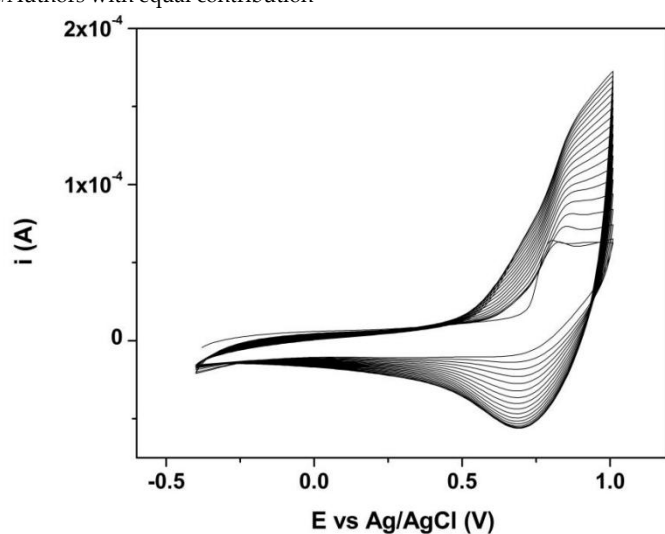

**Figure S1.** Successive cyclic voltamograms recorded in 1.5mM L in 0.1M TBAP, acetonitrile solution at carbon SPE (0.1 V/s).

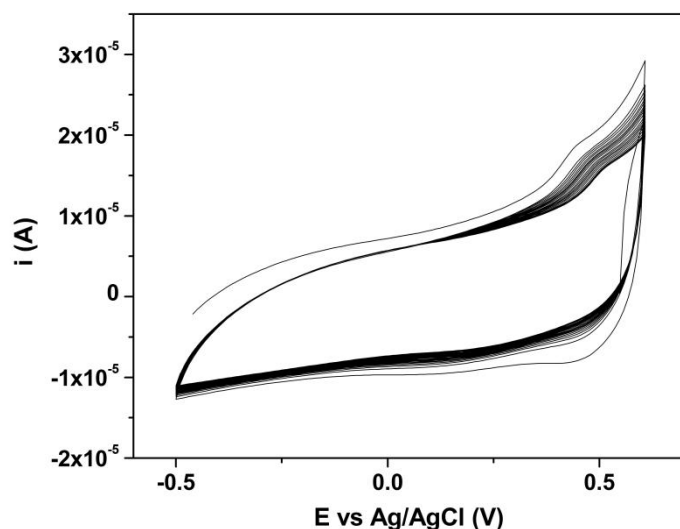

**Figure S2.** Successive cyclic voltamograms recorded in 0.1M TBAP, acetonitrile solution at SPE-polyL modified electrode (0.1 V/s).

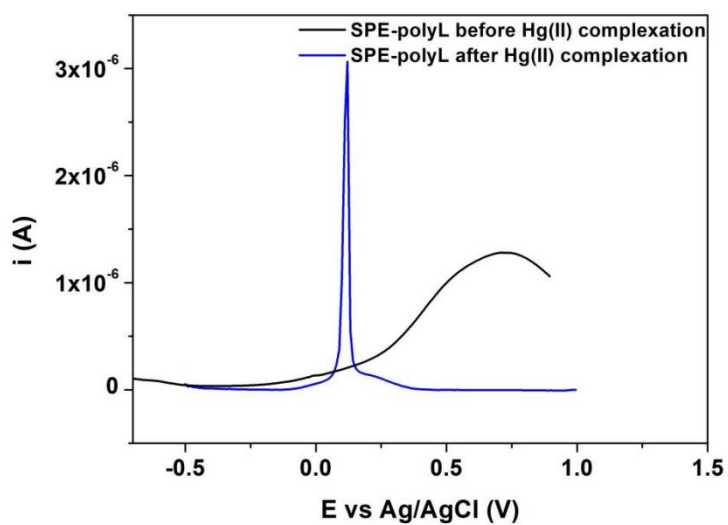

**Figure S3.** DPV stripping curves recorded on SPE electrode modified with polyL before and after mercury complexation; the accumulation was performed in acetate buffer at pH 3.0 containing  $10^{-7}$  M Hg(II) for a time of 20 min; and the reduction was performed at -1.3 V for 15 seconds.

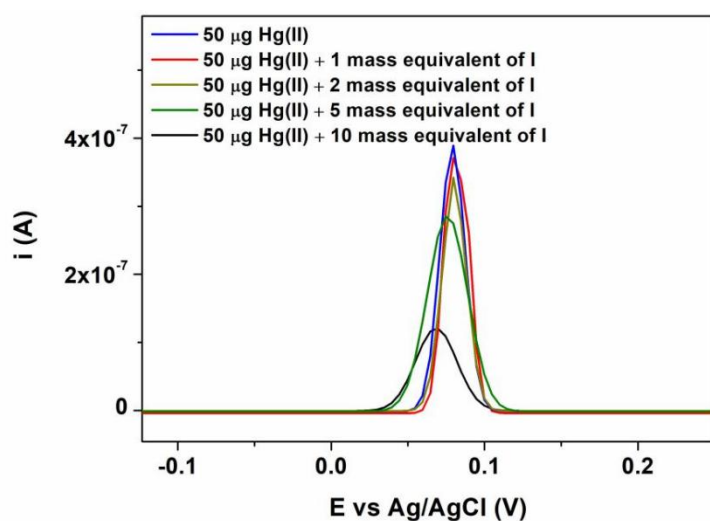

**Figure S4.** Effect of interfering cations (I: (Zn(II), Cd(II), Pb(II), Ni(II), Co(III), and Cu(II)) on  $50 \mu\text{g Hg(II)}$  detection after open-circuit accumulation of 20 min in acetate buffer (pH = 3). Each interfering ions is at the same specified mass equivalent vs. Hg(II) ions concentration.
